# Supplementary material for: Does the Inclusion of Static or Dynamic Stretching in the Warm-Up Routine Improve Jump Height and ROM in Physically Active Individuals? A Systematic Review with Meta-Analysis
Source: MDPI journal article supplement (doi:10.3390/app14093872), 2024-04-30
Supplement: s1 [file s1]

**Supplementary Table S1. Effects of moderating variables.**

| Static and dynamic studies<br>(n = 21)                                                                                                           | Dynamic studies<br>(n = 11)                                                                                                                      | Static studies<br>(n = 10)                                                                                                                        |
|--------------------------------------------------------------------------------------------------------------------------------------------------|--------------------------------------------------------------------------------------------------------------------------------------------------|---------------------------------------------------------------------------------------------------------------------------------------------------|
| CMJ                                                                                                                                              |                                                                                                                                                  |                                                                                                                                                   |
| 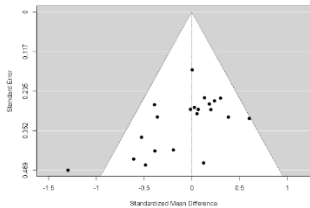 <p>Egger's Regression<br/><math>Z = -2.4, p = 0.025</math></p> |  <p>Egger's Regression<br/><math>Z = -1.3, p = 0.235</math></p> |  <p>Egger's Regression<br/><math>Z = -1.8, p = 0.113</math></p> |
| Static and dynamic studies<br>(n = 8)                                                                                                            | Dynamic studies<br>(n = 4)                                                                                                                       | Static studies<br>(n = 4)                                                                                                                         |
| ROM                                                                                                                                              |                                                                                                                                                  |                                                                                                                                                   |
|  <p>Egger's Regression<br/><math>Z = 3.4, p = 0.014</math></p> |  <p>Egger's Regression<br/><math>Z = 3.4, p = 0.014</math></p> |  <p>Egger's Regression<br/><math>Z = 5.4, p = 0.033</math></p> |
